# Supplementary material for: Heterogenous Genetic, Clinical, and Imaging Features in Patients with Neuronal Intranuclear Inclusion Disease Carrying NOTCH2NLC Repeat Expansion
Source: MDPI journal article supplement (doi:10.3390/brainsci13060955), 2023-06-15
Supplement: s1 [file s1]

**Supplementary Table 1. Association between expanded *NOTCH2NLC* repeat size and clinical/MRI features**

|                                               | Expanded <i>NOTCH2NLC</i> total repeat number, mean $\pm$ SD (range) |                                   | <i>P</i> value |
|-----------------------------------------------|----------------------------------------------------------------------|-----------------------------------|----------------|
|                                               | present                                                              | absent                            |                |
| <b>Clinical symptoms</b>                      |                                                                      |                                   |                |
| Cognitive decline                             | 148.5 $\pm$ 78.3 (97–361, n = 11)                                    | 111.0 $\pm$ 20.7 (94–141, n = 4)  | 0.32           |
| Hyporeflexia                                  | 151.7 $\pm$ 80.9 (97–361, n = 10)                                    | 112.2 $\pm$ 26.0 (94–361, n = 4)  | 0.12           |
| Consciousness disturbance                     | 145.0 $\pm$ 84.9 (94–361, n = 9)                                     | 129.2 $\pm$ 40.2 (97–198, n = 6)  | 0.98           |
| Cerebellar ataxia                             | 133.0 $\pm$ 36.7 (97–198, n = 9)                                     | 146.8 $\pm$ 105.2 (94–361, n = 6) | 0.37           |
| Dysarthria                                    | 124.3 $\pm$ 29.7 (97–175, n = 8)                                     | 154.9 $\pm$ 97.5 (94–361, n = 7)  | 0.89           |
| Encephalitis episodes                         | 145.3 $\pm$ 90.9 (94–361, n = 8)                                     | 130.9 $\pm$ 37.0 (97–198, n = 7)  | 0.67           |
| Gait disturbance                              | 132.0 $\pm$ 39.1 (97–198, n = 8)                                     | 146.0 $\pm$ 96.1 (94–361, n =7)   | 0.59           |
| Tremor                                        | 107.6 $\pm$ 5.9 (101–117, n = 7)                                     | 165.6 $\pm$ 87.8 (94–361, n = 8)  | 0.41           |
| Urinary dysfunction                           | 141.4 $\pm$ 37.8 (97–198, n = 7)                                     | 136.0 $\pm$ 91.1 (94–361, n = 8)  | 0.18           |
| Psychiatric symptoms                          | 162.9 $\pm$ 94.6 (97–361, n = 7)                                     | 117.3 $\pm$ 27.5 (94–175, n = 8)  | 0.27           |
| <b>MRI features</b>                           |                                                                      |                                   |                |
| Cerebellar atrophy                            | 141.7 $\pm$ 80.4 (94–361, n = 11)                                    | 129.8 $\pm$ 24.0 (104–158, n = 4) | 0.39           |
| DWI high-intensity lesions in corpus callosum | 147.7 $\pm$ 82.4 (97–361, n = 10)                                    | 120.2 $\pm$ 27.8 (94–158, n = 5)  | 0.53           |
| DWI high-intensity lesions in posterior lobe  | 134.0 $\pm$ 41.7 (101–198, n = 6)                                    | 141.6 $\pm$ 85.1 (94–361, n = 9)  | 0.47           |
| Paravermal lesions                            | 104.0 $\pm$ 7.7 (97–117, n = 5)                                      | 155.8 $\pm$ 80.0 (94–361, n = 10) | 0.07           |

FLAIR, fluid attenuated inversion recovery; DWI, diffusion weighted imaging

# Supplementary Figure 1

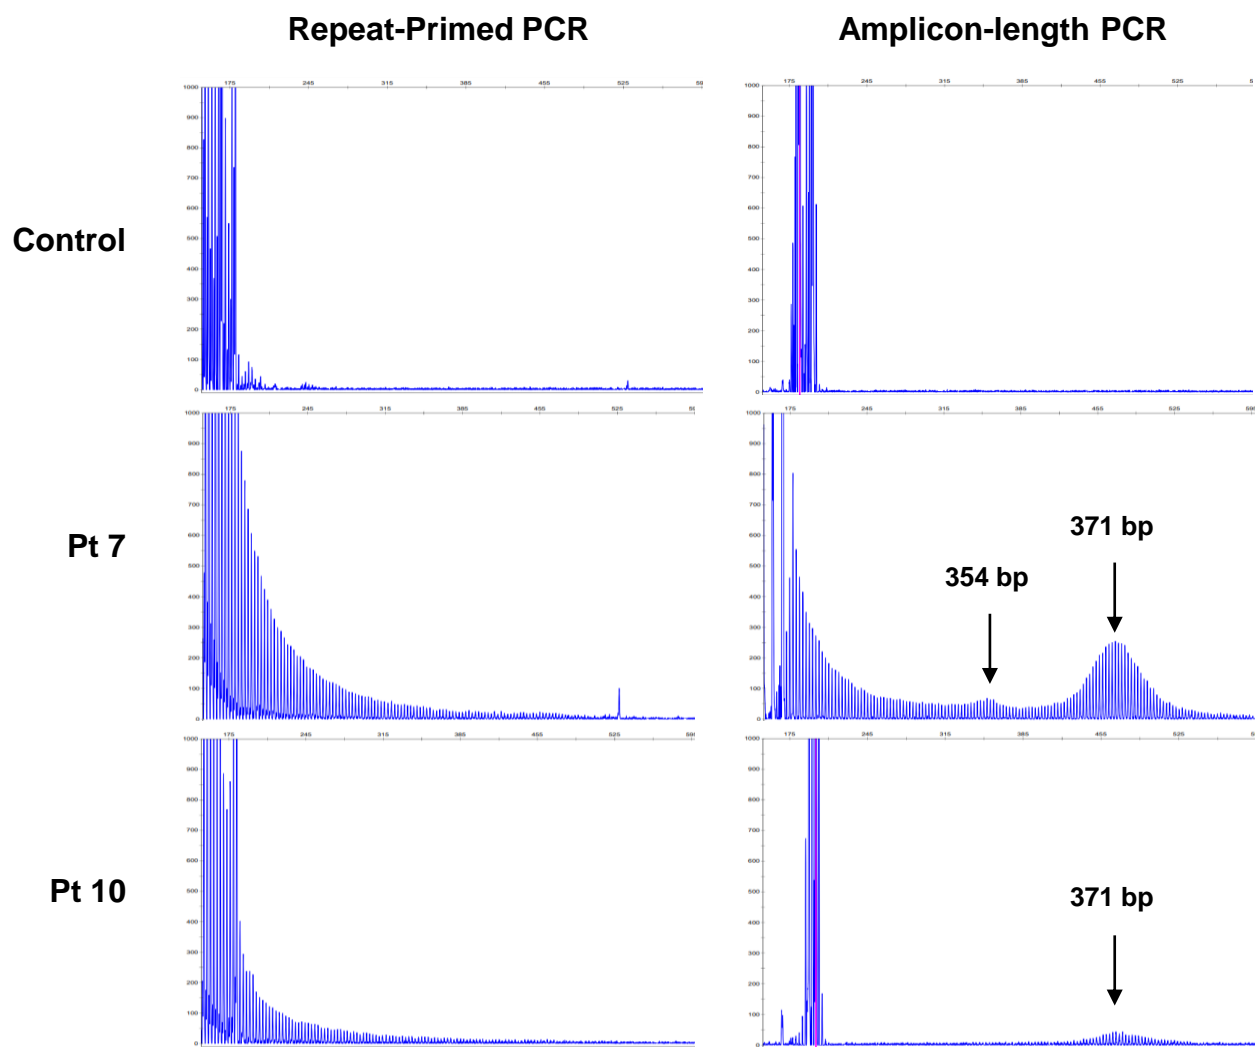

## Figure Legend

Representative results of repeat-primed and amplicon-length PCR of *NOTCH2NLC*. In Pt 7 and 10, a sawtooth pattern was observed by repeat-primed PCR (*left*). In Pt 7, two peaks at 354 and 371 bp, corresponding to expanded alleles, were observed by amplicon-length PCR (*right*). In Pt 10, a single peak at 371 bp, corresponding to an expanded allele, was observed.

## Supplementary Figure 2

**Pt 1**

Normal

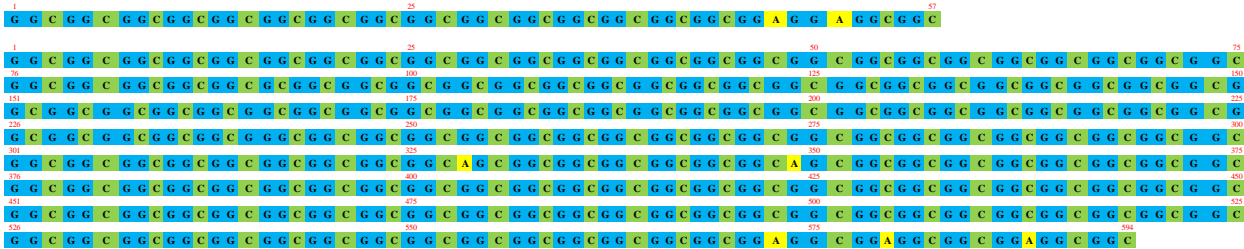

**Pt 2**

Normal

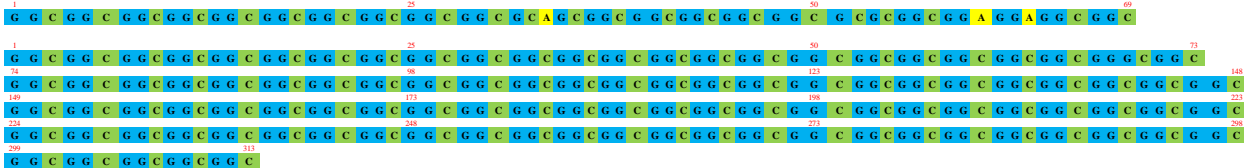

**Pt 3**

Normal

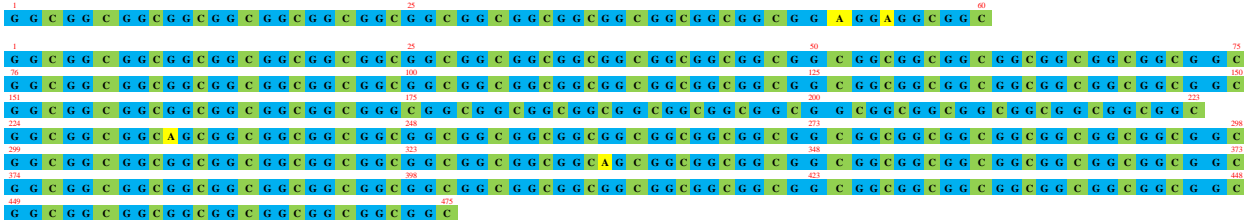

**Pt 4**

Normal

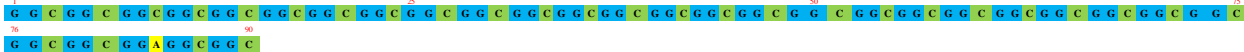

## Expansion

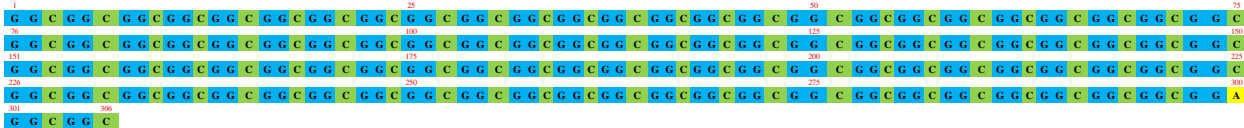

**Pt 5**

Normal

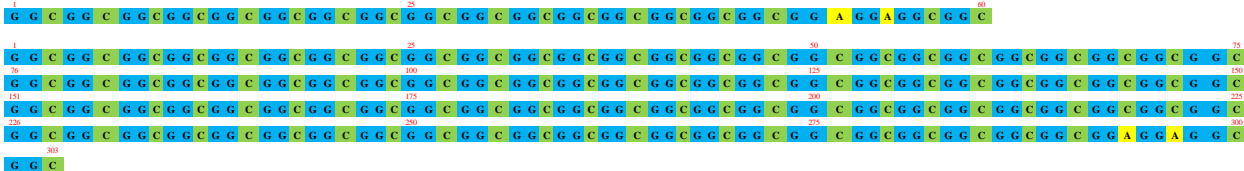

**Pt 6**

Normal

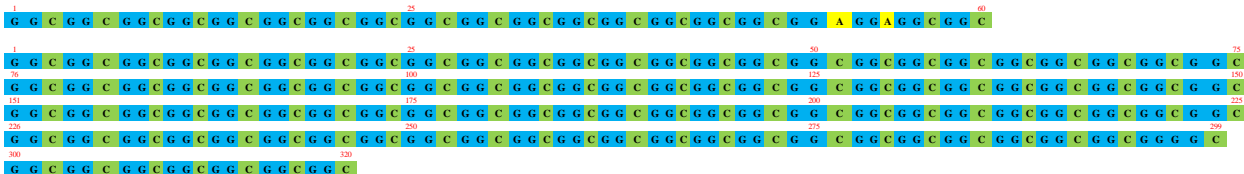

## Pt 8

Normal

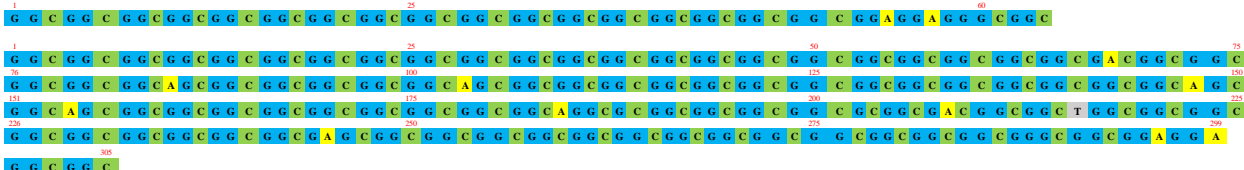

# Supplementary Figure 2 (continued)

## Pt 9

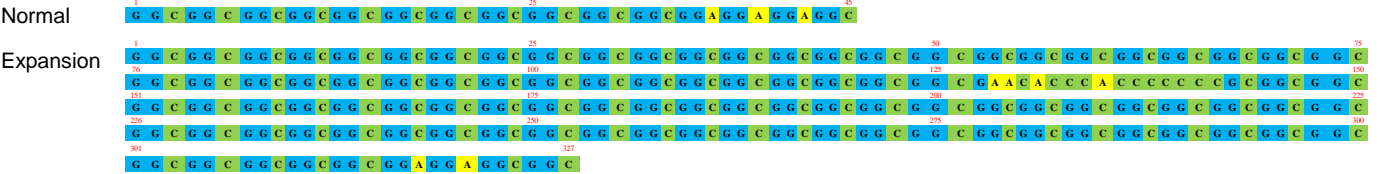

## Pt 10

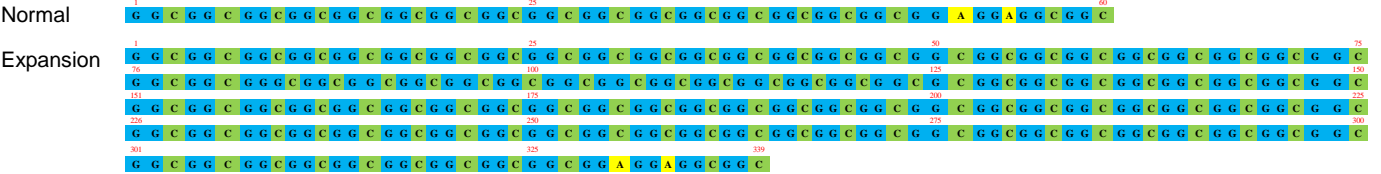

## Pt 11

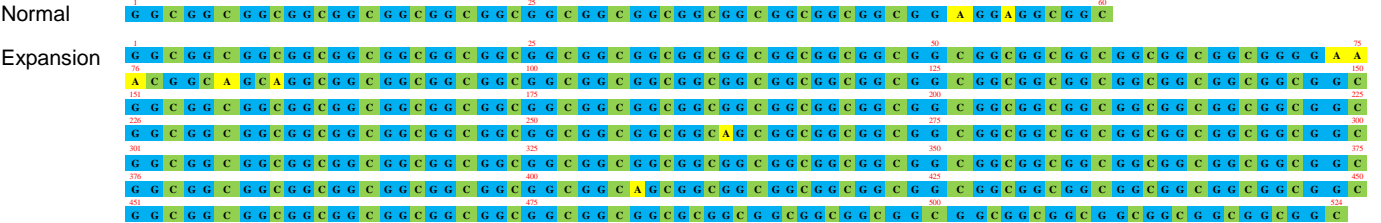

## Pt 12

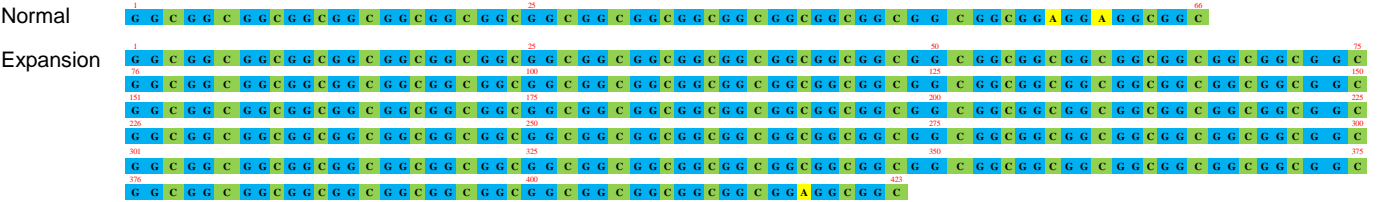

## Pt 13

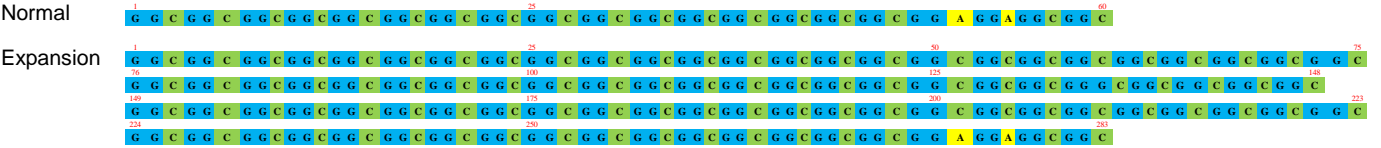

## Pt 15

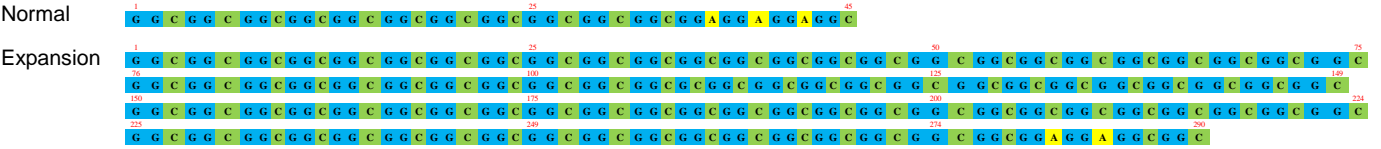

## Figure Legend

Repeat sequences in *NOTCH2NLC* in patients with NIID were shown. Pt 2 carried a pure GGC repeat expansion. Other patients carried GGC repeat expansions with other trinucleotide sequences such as GGA, AGC, and GAC.

Supplementary figure 3

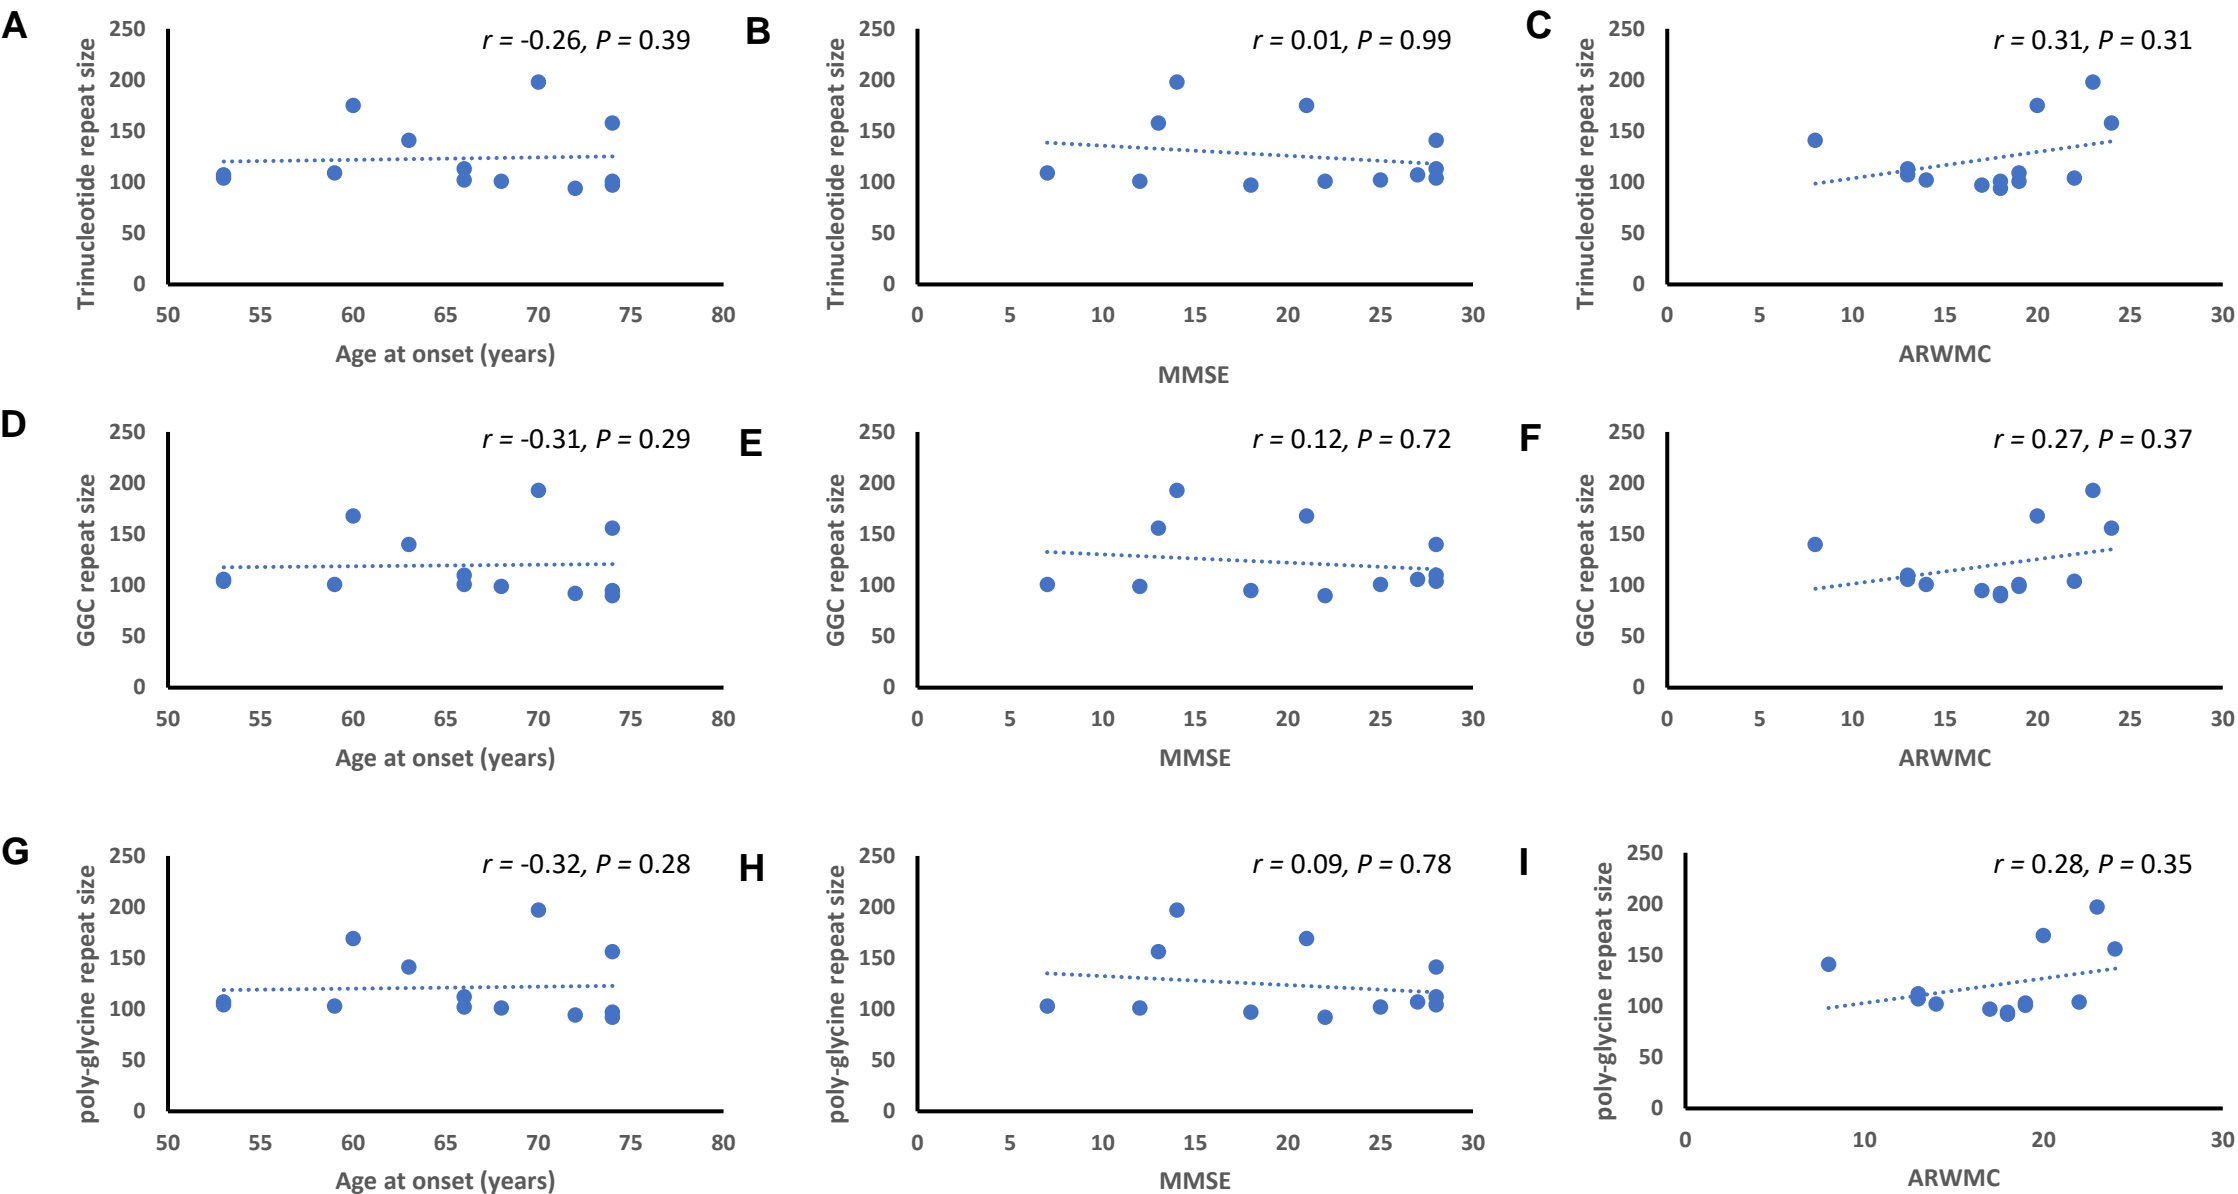

**Figure legend**  
Correlation between trinucleotide repeat length and age at onset (A), MMSE (B), and ARWMC (C) were shown. Correlations of these parameters were analyzed based on cumulative GGC repeat length (D-F) or poly-glycine repeat length (G-I).
